# Supplementary material for: Topological and causal structure of the yeast transcriptional regulatory network
Source: Springer Nature journal article supplement (doi:10.1038/ng873), 2002-04-22
Supplement: ng873-S3.pdf [file ng873-S3.pdf]

Web Table A. Transcriptional activations (P) or inhibitions (N) of target genes indicated in the last two columns, by the gene shown in the first column. In the third column are indicated the regulators of the gene shown in the first column. See definitions in main text.

| Regulatory gene | P/N | Genes regulating this regulatory gene      | Regulated regulatory genes                 | Other regulated genes                                                                                                                                                     |
|-----------------|-----|--------------------------------------------|--------------------------------------------|---------------------------------------------------------------------------------------------------------------------------------------------------------------------------|
| YAL021C         | P   | YHR119W                                    |                                            | YMR303C                                                                                                                                                                   |
| YBL005W         | P   | YBL005W YGL013C                            | YBL005W                                    | YBR008C YDR011W YDR406W<br>YGR281W YJL219W YOL156W<br>YOR153W YOR328W<br>YDR225W                                                                                          |
| YBL008W         | N   | YML010W                                    |                                            | YBL030C YDL205C YDL230W<br>YDR148C YDR232W YGL187C<br>YGR059W YHR008C YHR051W<br>YIL125W YJL166W YJR048W<br>YKL141W YKL148C YML091C<br>YNR001C YOR065W YOR375C<br>YPR191W |
| YBL021C         | P   |                                            |                                            | YBR020W                                                                                                                                                                   |
| YBL093C         | P   |                                            |                                            | YCR005C YLR304C YNL037C<br>YNR001C YOR136W                                                                                                                                |
| YBL103C         | P   | YDR176W YDR448W                            |                                            | YAL038W YBR019C YBR020W<br>YCR012W YDL140C YDL164C<br>YDR050C YER086W YFL039C<br>YGL026C YKL182W YMR186W<br>YOL006C YPL231W                                               |
| YBR049C         | P   |                                            | YDR146C YNL216W YOL004W                    | YGR254W                                                                                                                                                                   |
| YBR049C         | N   |                                            |                                            | YLR403W YOR077W                                                                                                                                                           |
| YBR083W         | P   | YHR084W                                    |                                            | YCR005C YER065C                                                                                                                                                           |
| YBR112C         | P   |                                            |                                            | STA1 YAL063C YAR050W<br>YDR172W YHR051W<br>YHR211W YIL162W YJR048W<br>YML058WA                                                                                            |
| YBR112C         | N   |                                            | YJR094C YLR256W                            |                                                                                                                                                                           |
| YBR182C         |     |                                            |                                            | YPL256C                                                                                                                                                                   |
| YBR279W         | P   |                                            |                                            | STA2 YAR071W YBR093C<br>YIL015W YIL162W YPL187W<br>YBR298C YBR299W                                                                                                        |
| YBR289W         | P   |                                            |                                            | YGL089C YIL099W YJR004C<br>YKL178C YLR113W YPL187W<br>STA1 STA2 STA3                                                                                                      |
| YBR297W         | P   |                                            |                                            |                                                                                                                                                                           |
| YCL066W         | P   | YCL067C YCR084C YCR097W<br>YNL216W YOL051W |                                            |                                                                                                                                                                           |
| YCL066W         | N   | YCL067C YCR084C YCR097W<br>YNL216W YOL051W |                                            |                                                                                                                                                                           |
| YCL067C         | N   | YNL216W                                    | YCL066W YGR044C YHR084W                    | YDR007W YGL089C YPL187W<br>YDR103W YFL026W YIL015W<br>YKL209C YLR452C YOR212W<br>YPL187W                                                                                  |
| YCL067C         | P   | YNL216W                                    |                                            | YDR113C YDR356W YGR098C<br>YMR198W                                                                                                                                        |
| YCR065W         | N   |                                            |                                            | YBR020W YEL039C YGL089C<br>YIL015W YJR047C YJR048W<br>YPL187W YER070W YFL026W<br>YIL066C YOR212W STA1<br>YDR103W YDR172W YDR402C<br>YDR403W YIL162W YKL209C               |
| YCR084C         | N   |                                            | YCL066W YGR044C YHR084W<br>YJR094C YPR065W |                                                                                                                                                                           |

|         |   |                         |                         |                         |
|---------|---|-------------------------|-------------------------|-------------------------|
|         |   |                         |                         | YLR452C YML058WA        |
| YCR093W | N |                         |                         | YOR202W                 |
| YCR097W | N |                         | YCL066W YGR044C         | STA1 STA2 STA3 YDR103W  |
| YCR097W | P |                         |                         |                         |
| YDL056W | P |                         |                         | YDL102W YDL164C YGR109C |
|         |   |                         |                         | YJL194W YMR199W YNL102W |
| YDL056W | N |                         |                         | YOR074C YPL256C YPR120C |
|         |   |                         |                         | YDL102W YDL164C YGR109C |
|         |   |                         |                         | YJL194W YMR199W YNL102W |
| YDL106C | P |                         |                         | YOR074C YPL256C YPR120C |
|         |   |                         |                         | YAR015W YBR093C YCL030C |
|         |   |                         |                         | YDR354W YDR408C YJR048W |
|         |   |                         |                         | YOR128C YBR248C YEL021W |
|         |   |                         |                         | YGL234W YGR061C YGR204W |
|         |   |                         |                         | YKL216W YLR359W YMR120C |
|         |   |                         |                         | YMR300C YNL220W         |
| YDL165W | N |                         |                         |                         |
| YDL170W | P |                         |                         | YDL210W YGR019W YBR006W |
| YDR034C | P |                         |                         | YBR115C YIR034C YNR050C |
| YDR043C | N |                         |                         | STA1                    |
| YDR123C | P | YDR207C                 |                         | YBR093C YDR497C YER026C |
|         |   |                         |                         | YGL077C YGR157W YJL153C |
|         |   |                         |                         | YJR073C YKL182W YLR133W |
| YDR123C | N | YDR207C                 |                         | YNR016C YPL231W         |
|         |   |                         |                         | YBR093C YDR497C YER026C |
|         |   |                         |                         | YGL077C YGR157W YJL153C |
|         |   |                         |                         | YJR073C YKL182W YLR133W |
|         |   |                         |                         | YNR016C YPL231W         |
| YDR146C | P | YBR049C YGL035C YGL209W | YGR044C YKL185W         | YDL127W YDL179W YJL194W |
|         |   | YMR043W                 |                         | YLR079W YNL327W         |
| YDR176W | P |                         | YBL103C                 | YIL162W YJL153C         |
| YDR207C | P | YOL004W                 | YDR123C YGR044C         | YER026C YGR157W YGR258C |
|         |   |                         |                         | YHR014W YJR052W YJR073C |
| YDR207C | N | YOL004W                 | YGL073W YJR094C YGR044C | YLR438W YOR386W YPL153C |
|         |   |                         |                         | YAL054C YDR403W YDR522C |
|         |   |                         |                         | YER044CA YHL022C        |
|         |   |                         |                         | YHR014W YHR152W YIL160C |
|         |   |                         |                         | YJL106W YJL153C YPL111W |
|         |   |                         |                         | YBR020W YER179W YIL015W |
|         |   |                         |                         | YIL072W YMR108W YPL240C |
|         |   |                         |                         | YDR285W YLR263W YLR329W |
|         |   |                         |                         | YMR133W YNL210W YOL006C |
|         |   |                         |                         | YOR351C YGL213C         |
| YDR216W | P |                         |                         | YDR256C YHL032C YIL160C |
|         |   |                         |                         | YKL197C YKR009C YMR303C |
|         |   |                         |                         | YOL086C                 |
| YDR392W | P |                         |                         | YCL030C                 |
| YDR397C | N |                         |                         |                         |
| YDR421W | P |                         |                         | YHR137W YDR380W         |
| YDR423C | P |                         |                         | YAL005C YBR126C YDR074W |
|         |   |                         |                         | YFL014W YGR088W YGR209C |
|         |   |                         |                         | YJL101C YLR043C YML100W |
|         |   |                         |                         | YMR261C YOL052CA        |
|         |   |                         |                         | YOR202W YOR208W         |

|         |   |                 |                         |                         |
|---------|---|-----------------|-------------------------|-------------------------|
| YDR448W | P |                 | YBL103C                 | YIL162W YJL153C         |
| YEL009C | P |                 | YNL103W                 | YDR035W YDR354W YER055C |
|         |   |                 |                         | YGL026C YHR018C YJL088W |
|         |   |                 |                         | YMR300C YOR202W YPR060C |
|         |   |                 |                         | YBR248C YCL030C YER086W |
|         |   |                 |                         | YMR108W YOL058W         |
|         |   |                 |                         | YOL140W YPR167C         |
| YER040W | P |                 | YJL110C YKR034W         | YBR208C YEL063C YHL016C |
|         |   |                 |                         | YIR028W YIR029W YIR031C |
|         |   |                 |                         | YIR032C YJR152W YKR039W |
|         |   |                 |                         | YDL171C YDL215C YFL021W |
|         |   |                 |                         | YGR019W YHR037W YLR142W |
|         |   |                 |                         | YOR348C YOR375C YPR035W |
| YER068W | N |                 |                         |                         |
| YER108C | P |                 |                         | STA2 YAR050W YIR019C    |
| YER111C | P | YGL207W YMR043W |                         | YLR286C YMR199W YNL289W |
|         |   |                 |                         | YPL256C                 |
| YER159C | N |                 |                         |                         |
| YER161C | N |                 |                         | YJL153C                 |
| YER169W | N |                 |                         | YOR386W                 |
| YFL031W | P |                 | YJR094C                 | YCL043C YDR518W YDR519W |
|         |   |                 |                         | YJL034W                 |
| YFR034C | P |                 |                         | YBR093C YDR481C YGR233C |
|         |   |                 |                         | YML123C YPL031C         |
| YGL013C | P |                 | YBL005W                 | YBR008C YDR011W YDR406W |
|         |   |                 |                         | YGR281W YIL013C YJL219W |
|         |   |                 |                         | YKL209C YMR307W YOL156W |
|         |   |                 |                         | YOR153W YOR328W         |
| YGL025C | P |                 |                         | YBR020W YBR093C YFL039C |
| YGL025C | N |                 |                         | YBR072W                 |
| YGL035C | N | YGL035C YGL209W | YDR146C YGL035C YKL109W | MAL61 YBR019C YBR020W   |
|         |   |                 | YMR280C YPL248C         | YBR126C YDR009W YFR053C |
|         |   |                 |                         | YIL162W YLR044C YLR377C |
|         |   |                 |                         | YBR050C YDR040C YHR092C |
|         |   |                 |                         | YKR075C YLL043W YMR011W |
|         |   |                 |                         | YBR101C YDR345C YEL070W |
|         |   |                 |                         | YFL054C YHR043C YHR094C |
|         |   |                 |                         | YLR042C YDR516C         |
| YGL043W | N |                 |                         | YLR420W                 |
| YGL073W | P | YDR207C         |                         | YAL005C YBL075C YBR072W |
|         |   |                 |                         | YER103W YFL014W YHR053C |
|         |   |                 |                         | YHR055C YJL034W YLL039C |
|         |   |                 |                         | YNL007C YPL106C YPL240C |
| YGL166W | P |                 |                         | YHR053C YHR055C YJR104C |
|         |   |                 |                         | YOR031W                 |
| YGL207W | P | YGL207W         | YER111C YGL207W YLR182W | YAL040C YCL018W YDR143C |
|         |   |                 |                         | YDR224C YDR225W YFL039C |
|         |   |                 |                         | YMR199W YPL256C         |
| YGL209W | N |                 | YDR146C YGL035C YKL109W | YBR019C YBR020W YBR126C |
|         |   |                 | YMR280C YPL248C         | YDR009W YIL162W YLR044C |
|         |   |                 |                         | YLR377C YBR050C YDR040C |
|         |   |                 |                         | YHR092C YKR075C YLL043W |
|         |   |                 |                         | YMR011W YBR101C YDR345C |
|         |   |                 |                         | YEL070W YFL054C YHR043C |

|         |   |                         |                 |  |                                                                                                                                                                                                                         |
|---------|---|-------------------------|-----------------|--|-------------------------------------------------------------------------------------------------------------------------------------------------------------------------------------------------------------------------|
| YGL237C | P |                         |                 |  | YHR094C YLR042C YDR516C<br>YBL030C YDL205C YDL230W<br>YDR148C YDR232W YFL018C<br>YGL187C YGR059W YHR008C<br>YHR051W YIL125W YJL166W<br>YJR048W YKL141W YKL148C<br>YML091C YNR001C YOR065W<br>YOR375C YPR191W<br>YPL092W |
| YGL254W | P |                         |                 |  |                                                                                                                                                                                                                         |
| YGR044C | N | YCL067C YCR084C YCR097W | YJR094C         |  |                                                                                                                                                                                                                         |
|         |   | YDR146C YDR207C YLR131C |                 |  |                                                                                                                                                                                                                         |
|         |   | YOL004W                 |                 |  |                                                                                                                                                                                                                         |
| YGR044C | P | YCL067C YCR084C YCR097W |                 |  | YPL256C                                                                                                                                                                                                                 |
|         |   | YDR146C YDR207C YLR131C |                 |  |                                                                                                                                                                                                                         |
|         |   | YOL004W                 |                 |  |                                                                                                                                                                                                                         |
| YGR288W | P |                         |                 |  | YGR292W YGR289C                                                                                                                                                                                                         |
| YHL009C |   |                         |                 |  |                                                                                                                                                                                                                         |
| YHL025W | P |                         |                 |  |                                                                                                                                                                                                                         |
| YHL027W | P |                         | YJR094C         |  | STA2 YAR071W YBR093C<br>YIL015W YIL162W<br>YDR402C YDR403W YIL072W<br>YJL106W                                                                                                                                           |
| YHR084W | P | YCL067C YCR084C         | YBR083W         |  | YCL027W YCR018C YDR461W<br>YFL026W YGL089C YIL015W<br>YIR019C YJL157C YKL178C<br>YKL209C YMR199W YNL145W<br>YOR077W YPL187W                                                                                             |
| YHR119W | N |                         | YAL021C YPL016W |  | YAL020C YAL029C YAL030W<br>YBR061C YDR044W YDR463W<br>YGR094W YHR043C YHR163W<br>YHR164C YJL071W YJL127C<br>YJL164C YJL165C YJL221C<br>YKL019W YML075C YMR290C<br>YNL289W YNL290W                                       |
| YIL038C | N |                         |                 |  |                                                                                                                                                                                                                         |
| YIL101C | N |                         |                 |  |                                                                                                                                                                                                                         |
| YIR017C | P | YJR060W YNL103W         |                 |  | YMR199W<br>YFR030W YJR010W YKL001C<br>YPR167C                                                                                                                                                                           |
| YIR018W |   |                         |                 |  |                                                                                                                                                                                                                         |
| YIR023W | P |                         |                 |  | YBR006W YBR208C YCL025C<br>YDL210W YGR019W YHL016C<br>YIR027C YIR028W YIR029W<br>YIR031C                                                                                                                                |
| YJL056C | P | YJL056C                 | YJL056C         |  | YGL255W YLR130C                                                                                                                                                                                                         |
| YJL110C | N | YER040W YJL110C YKR034W | YJL110C YKR034W |  | YDL210W YKR039W                                                                                                                                                                                                         |
| YJL176C | P |                         |                 |  | YBR019C YBR020W YIL162W<br>YJL153C YMR303C YOL086C<br>YDR502C YJR010W YLR303W<br>YNL277W YPR167C                                                                                                                        |
| YJR060W | P |                         | YIR017C YNL103W |  | YDR522C YDR523C YHL022C<br>YHR014W YIL072W YJL106W<br>YMR133W YNL210W<br>YOR159C                                                                                                                                        |
| YJR094C | P | YBR112C YCR084C YDR207C | YJR094C         |  | YHR037W YLR142W                                                                                                                                                                                                         |
|         |   | YFL031W YGR044C         |                 |  | YIL111W                                                                                                                                                                                                                 |
|         |   | YHL027W YJR094C         |                 |  | YGL062W                                                                                                                                                                                                                 |
| YKL015W | P |                         |                 |  |                                                                                                                                                                                                                         |
| YKL032C | N |                         |                 |  |                                                                                                                                                                                                                         |
| YKL038W | P |                         |                 |  |                                                                                                                                                                                                                         |

|         |   |         |         |         |                         |
|---------|---|---------|---------|---------|-------------------------|
| YKL038W | N |         |         |         | YDR345C YHR092C YMR011W |
| YKL062W | P |         |         |         | YAL062W YBL075C YBR117C |
|         |   |         |         |         | YBR126C YCL040W YDR074W |
|         |   |         |         |         | YER062C YER103W YFL014W |
|         |   |         |         |         | YFR053C YGR088W YHR008C |
|         |   |         |         |         | YIL066C YLL026W YMR105C |
|         |   |         |         |         | YMR169C YMR170C         |
|         |   |         |         |         | YOL052CA                |
| YKL109W | P | YGL035C | YGL209W |         | YBL030C YDL205C YDL230W |
|         |   |         |         |         | YDR148C YDR232W YFL018C |
|         |   |         |         |         | YGL187C YGR059W YHR008C |
|         |   |         |         |         | YHR051W YIL125W YJL166W |
|         |   |         |         |         | YJR048W YKL141W YKL148C |
|         |   |         |         |         | YML091C YNR001C YOR065W |
|         |   |         |         |         | YOR375C YPR191W         |
| YKL185W | N | YDR146C | YLR131C |         |                         |
| YKR034W | N | YER040W | YJL110C | YKR034W | YKR034W                 |
|         |   |         |         |         | YJL110C                 |
|         |   |         |         |         | YBR006W YBR208C YDL210W |
|         |   |         |         |         | YEL063C YGR019W YHL016C |
|         |   |         |         |         | YHR037W YIR028W YIR029W |
|         |   |         |         |         | YIR031C YIR032C YKR039W |
|         |   |         |         |         | YLR142W YOR348C YOR375C |
|         |   |         |         |         | YAR015W YBR248C YCL030C |
|         |   |         |         |         | YDR408C YER055C YGL234W |
|         |   |         |         |         | YGR061C YGR204W YLR359W |
|         |   |         |         |         | YMR120C YMR300C YNL220W |
|         |   |         |         |         | YOR128C                 |
| YKR206W | P |         |         |         | YAL005C YDL182W YDR353W |
|         |   |         |         |         | YDR453C YGR088W YGR209C |
|         |   |         |         |         | YHR008C YJR104C YKR066C |
|         |   |         |         |         | YLR043C YLR354C YML028W |
|         |   |         |         |         | YPL240C                 |
|         |   |         |         |         | YAL012W YOL151W         |
|         |   |         |         |         | YEL021W YKL216W YLR420W |
| YKR206W | N |         |         |         |                         |
| YLR014C | P |         |         |         |                         |
| YLR055C | N |         |         |         |                         |
| YLR098C | P |         |         |         |                         |
| YLR131C | P | YMR043W |         | YGR044C | YKL185W                 |
|         |   |         |         |         | YCL064C                 |
|         |   |         |         |         | YDL127W YDL179W YJL194W |
|         |   |         |         |         | YLR079W YNL327W YHR053C |
|         |   |         |         |         | YHR055C YLR286C         |
|         |   |         |         |         | YML058WA                |
| YLR176C | N | YLR176C |         | YLR176C |                         |
| YLR182W | P | YGL207W |         |         |                         |
|         |   |         |         |         | YDL127W YDL164C YER070W |
|         |   |         |         |         | YGR109C YJR057W YKL045W |
|         |   |         |         |         | YLR286C YMR199W YNL102W |
|         |   |         |         |         | YNL289W YOR074C YPL256C |
|         |   |         |         |         | YPR120C                 |
| YLR256W | P | YBR112C |         | YPR065W |                         |
|         |   |         |         |         | YDR044W YEL039C YGR088W |
|         |   |         |         |         | YHR008C YJR048W YML054C |
|         |   |         |         |         | YML075C YOR065W         |
|         |   |         |         |         | YHR007C                 |
| YLR256W | N | YBR112C |         |         |                         |
| YLR451W | P |         |         |         |                         |
|         |   |         |         |         | YCL018W YER086W YGL009C |
|         |   |         |         |         | YNL104C YOR375C         |
| YLR451W | N |         |         |         |                         |
|         |   |         |         |         | YCL018W YDR046C YER086W |
|         |   |         |         |         | YGL009C YNL104C YOR375C |
| YML007W | P |         |         |         |                         |
|         |   |         |         |         | YAL005C YAL012W YDR074W |
|         |   |         |         |         | YDR135C YDR453C YFL014W |
|         |   |         |         |         | YGR088W YGR209C YHR008C |

|         |   |                 |                         |                                                                                                                                                                                                                                                                                                                                        |
|---------|---|-----------------|-------------------------|----------------------------------------------------------------------------------------------------------------------------------------------------------------------------------------------------------------------------------------------------------------------------------------------------------------------------------------|
|         |   |                 |                         | YJL101C YJR104C YKR066C<br>YLR043C YLR109W YLR354C<br>YML028W YNL241C<br>YOL052CA YOL151W<br>YOR202W YOR208W<br>YPL091W                                                                                                                                                                                                                |
| YML010W | N |                 | YBL008W                 |                                                                                                                                                                                                                                                                                                                                        |
| YML099C | P |                 |                         | YPL111W                                                                                                                                                                                                                                                                                                                                |
| YML099C | N |                 |                         | YER069W YJL088W YLR438W<br>YOL058W YOL140W                                                                                                                                                                                                                                                                                             |
| YMR021C | P |                 |                         | YDR256C YLR214W YLR411W<br>YPR124W<br>YGR088W                                                                                                                                                                                                                                                                                          |
| YMR021C | P |                 |                         | YAL062W YBL075C YBR117C<br>YBR126C YCL040W YDR074W<br>YER062C YER103W YFL014W<br>YFR053C YGR088W YHR008C<br>YLL026W YIL066C YLL039C<br>YMR105C YMR169C YMR170C<br>YOL052CA                                                                                                                                                             |
| YMR037C | P |                 |                         |                                                                                                                                                                                                                                                                                                                                        |
| YMR039C | P |                 |                         | YPL111W                                                                                                                                                                                                                                                                                                                                |
| YMR042W | P |                 |                         | YER069W YJL088W YLR438W<br>YOL058W YOL140W                                                                                                                                                                                                                                                                                             |
| YMR042W | N |                 |                         | YAL040C YBR160W YBR202W<br>YDR403W YDR461W YER069W<br>YFL026W YGL008C YGL089C<br>YGR108W YIL015W YJL157C<br>YJL159W YJL194W YKL178C<br>YKL209C YKR066C YKR097W<br>YLR274W YNL145W YNL277W<br>YPL111W YPL187W YPR113W<br>YPR119W YPR200C<br>YCL018W YIL162W YJR048W<br>YCL027W YLR452C YNR044W<br>YPR141C<br>YKR097W YLR377C<br>YDR040C |
| YMR043W | P |                 | YDR146C YER111C YLR131C | YER091C YJR010W YKL001C<br>YLR303W YNL277W YPR167C<br>YAL038W YCL030C YCR012W<br>YGL008C YGR254W YHR174W<br>YOL086C                                                                                                                                                                                                                    |
| YMR070W | P |                 |                         | YBR208C YHL016C YIR027C<br>YIR028W YIR029W YIR031C                                                                                                                                                                                                                                                                                     |
| YMR070W | N |                 |                         |                                                                                                                                                                                                                                                                                                                                        |
| YMR280C | P | YGL035C YGL209W |                         | YCR012W                                                                                                                                                                                                                                                                                                                                |
| YNL027W | P | YNL027W         | YNL027W                 | STA2 YBR093C YHL022C<br>YIL015W YKL209C YMR303C<br>YCL027W YFL026W YHR014W<br>YIL072W YJL106W YJL153C<br>YKL178C YKL209C<br>YBR018C YBR019C YBR020W<br>YDL140C                                                                                                                                                                         |
| YNL103W | P | YEL009C YJR060W | YIR017C                 |                                                                                                                                                                                                                                                                                                                                        |
| YNL216W | P | YBR049C         | YCL067C YCL066W         |                                                                                                                                                                                                                                                                                                                                        |
| YNL309W |   |                 |                         |                                                                                                                                                                                                                                                                                                                                        |
| YNL314W | P |                 |                         |                                                                                                                                                                                                                                                                                                                                        |
| YNR023W | P |                 |                         |                                                                                                                                                                                                                                                                                                                                        |
| YNR052C | P |                 |                         |                                                                                                                                                                                                                                                                                                                                        |
| YOL004W | P | YBR049C         | YGR044C YPL016W         |                                                                                                                                                                                                                                                                                                                                        |
| YOL004W | N | YBR049C         | YDR207C                 |                                                                                                                                                                                                                                                                                                                                        |
| YOL051W | P |                 |                         |                                                                                                                                                                                                                                                                                                                                        |

|         |   |                            |         |                         |
|---------|---|----------------------------|---------|-------------------------|
| YOL051W | N |                            | YCL066W |                         |
| YOL067C | P |                            |         | YCR005C YEL071W YLR304C |
| YOL108C | P |                            |         | YNL037C YNR001C YOR136W |
|         |   |                            |         | YBR093C YDR497C YER026C |
|         |   |                            |         | YGL077C YGR157W YJL153C |
|         |   |                            |         | YJR073C YKL182W YLR133W |
|         |   |                            |         | YNR016C YPL231W         |
| YOL116W | P |                            |         | STA1 STA2 STA3 YFL014W  |
|         |   |                            |         | YIR019C                 |
| YOR140W | N |                            |         | YIL162W                 |
| YOR230W | N |                            |         | YJL106W                 |
| YOR290C | P |                            |         | STA2 YAR071W YBR019C    |
|         |   |                            |         | YBR020W YBR093C YER026C |
|         |   |                            |         | YGR157W YIL162W YJL153C |
|         |   |                            |         | YJR073C YLR133W YMR303C |
|         |   |                            |         | YOL086C                 |
| YOR344C | P |                            |         | YHR174W YOL086C         |
| YOR358W | P |                            |         | YHR008C                 |
| YOR363C | P |                            |         | YBR159W YDL078C YDR244W |
|         |   |                            |         | YDR256C YER015W YGL205W |
|         |   |                            |         | YIL160C YJL218W YJR019C |
|         |   |                            |         | YKL188C YKR009C YLR284C |
|         |   |                            |         | YML042W YNL009W         |
|         |   |                            |         | YNL202W YNL329C YNR001C |
|         |   |                            |         | YOL002C YOL147C YOR100C |
|         |   |                            |         | YOR180C YPL095C         |
| YPL016W | P | YHR119W YOL004W            |         | STA1 STA2 YBR019C       |
|         |   |                            |         | YBR020W YIL162W YJL153C |
|         |   |                            |         | YMR303C YOL086C         |
| YPL075W | P |                            |         | YAL038W YBR118W YCL030C |
|         |   |                            |         | YCL050C YCR012W YCR031C |
|         |   |                            |         | YDR050C YGR254W YHR174W |
|         |   |                            |         | YJR048W YKL152C YLR044C |
|         |   |                            |         | YOL086C YPR080W         |
| YPL082C | P |                            |         | YCL030C                 |
| YPL089C |   |                            |         |                         |
| YPL248C | P | YGL035C YGL209W            |         | MEL1 YBR018C YBR019C    |
|         |   |                            |         | YBR020W YNR081W         |
|         |   |                            |         | YML051W YMR105C YOR120W |
| YPR065W | N | YCR084C YLR256W<br>YPR065W | YPR065W | YBL045C YBR085W YDR044W |
|         |   |                            |         | YDR155C YEL039C YGL055W |
|         |   |                            |         | YGL162W YHR007C YHR042W |
|         |   |                            |         | YJR047C YLR450W         |
| YPR072W |   |                            |         |                         |
